# Supplementary material for: Conservation of the Nrf2‐Mediated Gene Regulation of Proteasome Subunits and Glucose Metabolism in Zebrafish
Source: Hindawi journal article supplement (doi:10.1155/2016/5720574), 2016-01-01
Supplement: f1 [file 5720574.f1.zip]

Archive with 4 entries (4 files):
- omcl16.Nguyen.figS1.rev1.mk3.pdf
- omcl16.Nguyen.figS1.rev1.mk3.pptx
- omcl16.Nguyen.figS2.rev2.mk3.pdf
- omcl16.Nguyen.figS2.rev2.mk3.pptx
