# Supplementary material for: Conservation of the Nrf2‐Mediated Gene Regulation of Proteasome Subunits and Glucose Metabolism in Zebrafish
Source: Hindawi journal article supplement (doi:10.1155/2016/5720574), 2016-01-01
Supplement: f1 [file 5720574.f1.zip › omcl16.Nguyen.figS1.rev1.mk3.pdf]

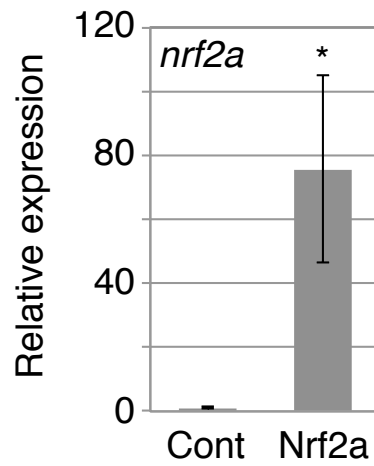

FIGURE S1: The validation of the Nrf2a overexpression. Expression levels of *nrf2a* mRNA in 8 hpf wild-type embryos injected with or without 100 pg of *nrf2a* mRNA at the 1-cell stage were analyzed by real-time qPCR. Total RNA was extracted from 30 embryos for each sample. The expression of each gene was normalized to that of *ef1a* (means  $\pm$  SEM), and the value in uninjected control was set to 1. Asterisks denote statistical significance (Control vs. *nrf2a* overexpression,  $*P < 0.05$ ; Student's *t*-test,  $n=6$  for each group).
