# Supplementary material for: Conservation of the Nrf2‐Mediated Gene Regulation of Proteasome Subunits and Glucose Metabolism in Zebrafish
Source: Hindawi journal article supplement (doi:10.1155/2016/5720574), 2016-01-01
Supplement: f1 [file 5720574.f1.zip › omcl16.Nguyen.figS2.rev2.mk3.pdf]

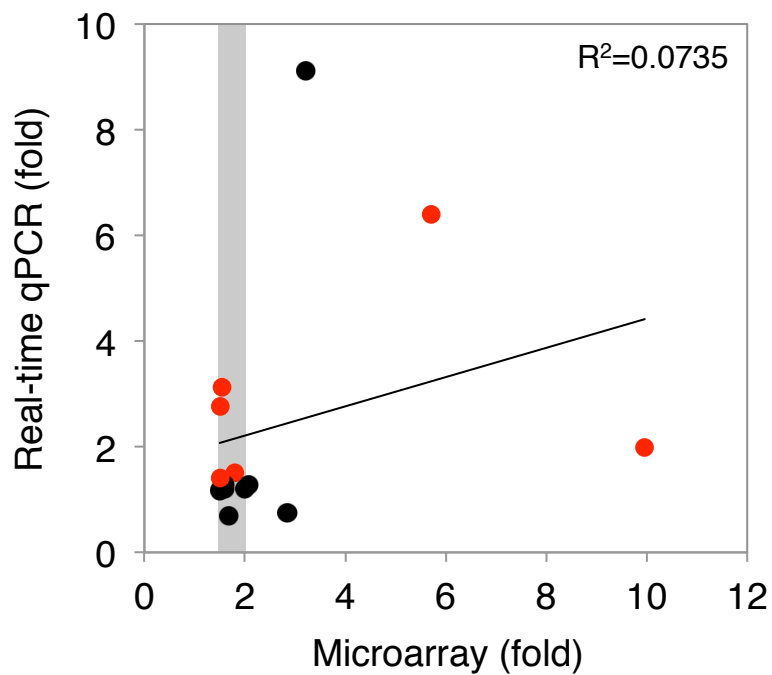

FIGURE S2: Correlation between the gene induction levels determined by microarray and real-time qPCR analyses. Gene induction levels validated by a real-time qPCR were plotted against the induction levels from the microarray data set (n=14). Red dots indicate 6 genes whose induction was confirmed by real-time qPCR with statistical significance. Correlation coefficient was calculated by linear least-squares regression analysis. Genes in the gray area are those showed Nrf2a-dependent upregulation in the microarray analysis in the range between 1.5- and 2-fold change.
