# Supplementary material for: Conservation of the Nrf2‐Mediated Gene Regulation of Proteasome Subunits and Glucose Metabolism in Zebrafish
Source: Hindawi journal article supplement (doi:10.1155/2016/5720574), 2016-01-01
Supplement: f2 [file 5720574.f2.pdf]

TABLE S1: The oligonucleotide primers used for the real-time qPCR

| Genes         | Primer sequences           |
|---------------|----------------------------|
| <i>eflA</i>   | 5'-CGTGGTAATGTGGCTGGAGA    |
|               | 5'-CTGAGCGTTGAAGTTGGCAG    |
| <i>fbp1a</i>  | 5'-ATCGTTGTAGAGCCAGATAGAC  |
|               | 5'-TGTAGATGGCAAAGATGGTCC   |
| <i>gclm</i>   | 5'-ATCCATCAGAAGTGCGGTAG    |
|               | 5'-AGTGTCTGGCTTTCACCCTC    |
| <i>gsr</i>    | 5'-CAGATTTACAGGAGCAACCTTG  |
|               | 5'-TGACTTCAACTGTGGGTTTCAG  |
| <i>gsto2</i>  | 5'-ATGGCTTCATCTCCAAAATGC   |
|               | 5'-AGGGCAGAATCTCATGCTGTAG  |
| <i>gstp1</i>  | 5'-CAACGCCATGCTGAGACATC    |
|               | 5'-GAAGATCTTCAACGCCGTCG    |
| <i>keap1a</i> | 5'-ATACCAACCAGACACCAACAC   |
|               | 5'-GGTTTGTCCATCATAGCCTCC   |
| <i>nrf2a</i>  | 5'-ATGTCTAAAATGCAGCCAAGCC  |
|               | 5'-CGGTAGCTGAAGTCGAACAC    |
| <i>pck1</i>   | 5'-GGAGAACAGCACCATCCTCAG   |
|               | 5'-AGTCGGTGTGGGAACCGTG     |
| <i>pcxb</i>   | 5'-AGATGGGGGATAAAGTGGAAG   |
|               | 5'-TCTTGAAGGCATGAGATAGGAG  |
| <i>pgd</i>    | 5'-TGGAATACGGCACACCTGTC    |
|               | 5'-AGGCTCTTACTGGCCTGAAC    |
| <i>psma3</i>  | 5'-ACGGAAGGGTATTTTCAGGTTG  |
|               | 5'-TCATACAGCTTGGACAGTACC   |
| <i>psma5</i>  | 5'-AGTAAACACTTTCTCACCAGAAG |
|               | 5'-TCTCCACAGCAAGACAAACTC   |
| <i>psmb7</i>  | 5'-GAGCTTCATTCTCTGTCCACC   |
|               | 5'-GCAATCGACACCTCCAAGAAC   |
| <i>sqstm1</i> | 5'-TTGGCTCTTGTGAAGGATGAC   |
|               | 5'-TGTAGTGAACGGAAACCCAGG   |
| <i>taldo1</i> | 5'-TCTGTATCACCGGACAAACG    |
|               | 5'-TCCTGAGGCTTGTACTCTTC    |

TABLE S2: The oligonucleotide primers used for plasmid construction

| Plasmids | Primer sequences                    |
|----------|-------------------------------------|
| pKSpsma3 | 5'-GGGGGATCCTGATCGCAGTGACTTAAAATG   |
|          | 5'-GGGCTCGAGACATGTTGTCCTCATCAGAGTC  |
| pKSpsma5 | 5'-GGGGAATTCTCCACTGCAGAAGATTTGCG    |
|          | 5'-GGGCTCGAGAGCACGTTTAGATATCCTTGATG |
| pKSpsmb7 | 5'-GGGGGATCCAGACCGCAGAATCATGGCGAC   |
|          | 5'-GGGCTCGAGTCTTGTTGGCAATGTCGTGAG   |
| pKSpgd   | 5'-GGGGGATCCAGCAGTCAAAACCCTCATCG    |
|          | 5'-GGGCTCGAGCATTCCCTGTGCCCTTCTG     |
| pKSfbp1a | 5'-GGGGGATCCGATGGTTCATCCAACATTGAC   |
|          | 5'-GGGCTCGAGGGCATCTTATTCTGGAGTGTC   |

TABLE S3: The genes induced by the overexpression of *nrf2a* in zebrafish.

| Ratio | Gene symbol<br>in ZFIN (or [19]) | Gene product                                                                   | Refs.      |                    |
|-------|----------------------------------|--------------------------------------------------------------------------------|------------|--------------------|
|       |                                  |                                                                                | microarray | confirmd by<br>PCR |
| 9.96  | <i>gclm</i>                      | glutamate-cysteine ligase, modifier subunit                                    | [19,20]    | [19]               |
| 7.34  | <i>hmox1a</i>                    | heme oxygenase 1a                                                              | –          | [19]               |
| 6.53  | <i>pimr138</i>                   | Pim proto-oncogene, serine/threonine kinase, related 138                       | –          | –                  |
| 5.81  | <i>aifm4</i>                     | apoptosis-inducing factor, mitochondrion-associated, 4                         | [19,20]    | –                  |
| 5.71  | <i>gstp1</i>                     | glutathione <i>S</i> -transferase pi 1                                         | [19]       | [11,16,17,19]      |
| 4.50  | <i>txn</i>                       | thioredoxin                                                                    | [19,20]    | [16]               |
| 4.02  | <i>zp211</i>                     | zona pellucida glycoprotein 2, like 1                                          | –          | –                  |
| 3.83  | <i>zgc:92066 (fthl)</i>          | ferritin heavy chain like                                                      | [19,20]    | [19]               |
| 3.39  | <i>tex2</i>                      | testis expressed 2                                                             | [19]       | –                  |
| 3.21  | <i>gsto2</i>                     | glutathione <i>S</i> -transferase omega 2                                      | [19]       | –                  |
| 2.98  | <i>gclc</i>                      | glutamate-cysteine ligase, catalytic subunit                                   | [20]       | [16,17,19]         |
| 2.84  | <i>pcxb</i>                      | pyruvate carboxylase b                                                         | [19]       | –                  |
| 2.70  | <i>exorh</i>                     | extra-ocular rhodopsin                                                         | –          | –                  |
| 2.65  | <i>zfand2a</i>                   | zinc finger, AN1-type domain 2A                                                | –          | –                  |
| 2.49  | <i>ugdh</i>                      | UDP-glucose 6-dehydrogenase                                                    | [19]       | –                  |
| 2.47  | <i>mgst3b</i>                    | microsomal glutathione <i>S</i> -transferase 3b                                | [19,20]    | [19]               |
| 2.37  | <i>sepw2b</i>                    | selenoprotein W, 2b                                                            | [19]       | [19]               |
| 2.36  | <i>pisd</i>                      | phosphatidylserine decarboxylase                                               | –          | –                  |
| 2.33  | <i>lgals2a</i>                   | lectin, galactoside-binding, soluble, 2a                                       | –          | –                  |
| 2.32  | <i>cbr11</i>                     | carbonyl reductase 1-like                                                      | [19]       | –                  |
| 2.25  | <i>lrrc6</i>                     | leucine rich repeat containing 6                                               | –          | –                  |
| 2.25  | <i>tjp2b</i>                     | tight junction protein 2b (zona occludens 2)                                   | –          | –                  |
| 2.13  | <i>sqrcl</i>                     | sulfide quinone reductase-like (yeast)                                         | [19]       | –                  |
| 2.13  | <i>spata6l</i>                   | spermatogenesis associated 6-like                                              | –          | –                  |
| 2.11  | <i>sec23b</i>                    | Sec23 homolog B, COPII coat complex component                                  | –          | –                  |
| 2.11  | <i>slc40a1</i>                   | solute carrier family 40 (iron-regulated transporter), member 1                | –          | –                  |
| 2.09  | <i>rab43</i>                     | RAB43, member RAS oncogene family                                              | [19]       | –                  |
| 2.08  | <i>sqstm1</i>                    | sequestosome 1                                                                 | [20]       | –                  |
| 2.07  | <i>lmo7a</i>                     | LIM domain 7a                                                                  | –          | –                  |
| 2.06  | <i>hsp90aa1.1</i>                | heat shock protein 90, alpha (cytosolic), class A member 1, tandem duplicate 1 | –          | –                  |
| 2.00  | <i>keap1a</i>                    | kelch-like ECH-associated protein 1a                                           | [20]       | –                  |
| 2.00  | <i>fam13b</i>                    | family with sequence similarity 13, member B                                   | –          | –                  |
| 1.94  | <i>tradd</i>                     | tnfrsf1a-associated via death domain                                           | –          | –                  |
| 1.94  | <i>ctsk</i>                      | cathepsin K                                                                    | –          | –                  |
| 1.94  | <i>selp</i>                      | selectin P                                                                     | –          | –                  |
| 1.92  | <i>tpk1</i>                      | thiamin pyrophosphokinase 1                                                    | –          | –                  |
| 1.91  | <i>rsrp1</i>                     | arginine/serine-rich protein 1                                                 | [20]       | –                  |
| 1.87  | <i>gsta.1 (gsta)</i>             | glutathione <i>S</i> -transferase, alpha tandem duplicate 1                    | [19]       | [19]               |
| 1.87  | <i>epoa</i>                      | erythropoietin a                                                               | –          | –                  |
| 1.85  | <i>pfas</i>                      | phosphoribosylformylglycinamide synthase                                       | –          | –                  |
| 1.85  | <i>setdb1a</i>                   | SET domain, bifurcated 1a                                                      | –          | –                  |

Gray highlighting indicate genes that were also identified in the previous microarray analyses using DEM- or tBHQ-treated larvae [19,20].

TABLE S3: The genes induced by the overexpression of *nrf2a* in zebrafish. (continued)

| Ratio | Gene symbol<br>in ZFIN (or [19]) | Gene product                                                                 | Refs.      |                     |
|-------|----------------------------------|------------------------------------------------------------------------------|------------|---------------------|
|       |                                  |                                                                              | microarray | confirmed by<br>PCR |
| 1.84  | <i>apoa1a</i>                    | apolipoprotein A-1a                                                          | –          | –                   |
| 1.83  | <i>gpx1b</i>                     | glutathione peroxidase 1b                                                    | –          | –                   |
| 1.80  | <i>pik3c2a</i>                   | phosphatidylinositol-4-phosphate 3-kinase,<br>catalytic subunit type 2 alpha | –          | –                   |
| 1.80  | <i>psma3</i>                     | proteasome subunit alpha 3                                                   | –          | –                   |
| 1.78  | <i>cyp2r1</i>                    | cytochrome P450, family 2, subfamily R, polypeptide 1                        | –          | –                   |
| 1.78  | <i>si:dkey-33c12.4</i>           | tetratricopeptide repeat domain 31 (ttc31)<br>(ENSDARG00000057890)           | –          | –                   |
| 1.78  | <i>esrp1</i>                     | epithelial splicing regulatory protein 1                                     | –          | –                   |
| 1.78  | <i>si:ch211-95j8.2</i>           | claudin 23 like (ENSDARG00000028096)                                         | –          | –                   |
| 1.78  | <i>coa3a</i>                     | cytochrome C oxidase assembly factor 3a                                      | –          | –                   |
| 1.72  | <i>epn2</i>                      | epsin 2                                                                      | –          | –                   |
| 1.72  | <i>brfla</i>                     | BRF1, RNA polymerase III transcription initiation factor a                   | –          | –                   |
| 1.71  | <i>col4a1</i>                    | collagen, type IV, alpha 1                                                   | –          | –                   |
| 1.71  | <i>ndrg3a</i>                    | ndrg family member 3a                                                        | –          | –                   |
| 1.69  | <i>tp53bp2a</i>                  | tumor protein p53 binding protein, 2a                                        | –          | –                   |
| 1.68  | <i>cxcr4b</i>                    | chemokine (C-X-C motif), receptor 4b                                         | –          | –                   |
| 1.68  | <i>phyh</i>                      | phytanoyl-CoA 2-hydroxylase                                                  | –          | –                   |
| 1.68  | <i>nudc</i>                      | nudC nuclear distribution protein                                            | –          | –                   |
| 1.68  | <i>glde</i>                      | glycine dehydrogenase (decarboxylating)                                      | –          | –                   |
| 1.68  | <i>taldo1</i>                    | transaldolase 1                                                              | –          | –                   |
| 1.67  | <i>si:dkey-122c11.8</i>          | novel gene, “zinc finger protein”                                            | –          | –                   |
| 1.67  | <i>anxa1a</i>                    | annexin A1a                                                                  | –          | –                   |
| 1.66  | <i>zgc:163022<br/>(frrs1c)</i>   | ferric-chelate reductase like (CABZ01041812.1)                               | [19]       | [19]                |
| 1.66  | <i>dnase1l3</i>                  | deoxyribonuclease I-like 3                                                   | –          | –                   |
| 1.65  | <i>atp2b2</i>                    | ATPase, Ca <sup>++</sup> transporting, plasma membrane 2                     | –          | –                   |
| 1.63  | <i>rbm24a</i>                    | RNA binding motif protein 24a                                                | –          | –                   |
| 1.62  | <i>uqcrcq</i>                    | ubiquinol-cytochrome c reductase, complexIII subunit VII                     | –          | –                   |
| 1.62  | <i>rab3il1</i>                   | RAB3A interacting protein (rabin3)-like 1                                    | –          | –                   |
| 1.62  | <i>sst6</i>                      | somatostatin 6                                                               | –          | –                   |
| 1.62  | <i>myh9a</i>                     | myosin, heavy chain 9a, non-muscle                                           | –          | –                   |
| 1.61  | <i>kpna1</i>                     | karyopherin alpha 1 (importin alpha 5)                                       | –          | –                   |
| 1.60  | <i>pck1</i>                      | phosphoenolpyruvate carboxykinase 1 (soluble)                                | [19]       | –                   |
| 1.60  | <i>psma5</i>                     | proteasome subunit alpha 5                                                   | –          | –                   |
| 1.60  | <i>prdx5</i>                     | peroxiredoxin 5                                                              | –          | –                   |
| 1.60  | <i>gpx1a</i>                     | glutathione peroxidase 1a                                                    | –          | –                   |
| 1.59  | <i>lmna</i>                      | lamin A                                                                      | –          | –                   |
| 1.57  | <i>tmem106a</i>                  | transmembrane protein 106A                                                   | –          | –                   |
| 1.57  | <i>gramd1c</i>                   | GRAM domain containing 1c                                                    | –          | –                   |
| 1.57  | <i>si:ch211-106h4.6</i>          | novel gene, “plexin domain containing like”                                  | –          | –                   |
| 1.57  | <i>hoxb6b</i>                    | homeobox B6b                                                                 | –          | –                   |
| 1.56  | <i>srprb</i>                     | signal recognition particle receptor, B subunit                              | –          | –                   |

Gray highlighting indicate genes that were also identified in the previous microarray analyses using DEM- or tBHQ-treated larvae [19,20].

TABLE S3: The genes induced by the overexpression of *nrf2a* in zebrafish. (continued)

| Ratio | Gene symbol<br>in ZFIN (or [19]) | Gene product                                                                     | Refs.      |                     |
|-------|----------------------------------|----------------------------------------------------------------------------------|------------|---------------------|
|       |                                  |                                                                                  | microarray | confirmed by<br>PCR |
| 1.55  | <i>slx4</i>                      | SLX4 structure-specific endonuclease subunit homolog<br>( <i>S. cerevisiae</i> ) | –          | –                   |
| 1.55  | <i>gsr</i>                       | glutathione reductase                                                            | [20]       | –                   |
| 1.55  | <i>fr82</i>                      | fin TRIM family, member 82                                                       | –          | –                   |
| 1.55  | <i>map1b</i>                     | microtubule-associated protein 1B                                                | –          | –                   |
| 1.55  | <i>prkcd</i>                     | protein kinase C, delta b                                                        | [19]       | –                   |
| 1.55  | <i>pth1ra</i>                    | parathyroid hormone 1 receptor a                                                 | –          | –                   |
| 1.55  | <i>calm3a</i>                    | calmodulin 3a (phosphorylase kinase, delta)                                      | –          | –                   |
| 1.55  | <i>gatm</i>                      | glycine amidinotransferase (L-arginine:glycine<br>amidinotransferase)            | –          | –                   |
| 1.54  | <i>smc5</i>                      | structural maintenance of chromosomes 5                                          | –          | –                   |
| 1.54  | <i>caska</i>                     | calcium/calmodulin-dependent serine protein kinase a                             | –          | –                   |
| 1.54  | <i>opn1mw1</i>                   | opsin 1 (cone pigments), medium-wave-sensitive, 1                                | –          | –                   |
| 1.54  | <i>lcp1</i>                      | lymphocyte cytosolic protein 1 (L-plastin)                                       | –          | –                   |
| 1.54  | <i>aoc2</i>                      | amine oxidase, copper containing 2                                               | [19]       | –                   |
| 1.54  | <i>epb41l5</i>                   | erythrocyte membrane protein band 4.1 like 5                                     | –          | –                   |
| 1.54  | <i>tacc2</i>                     | transforming, acidic coiled-coil containing protein 2                            | –          | –                   |
| 1.53  | <i>rbm24a</i>                    | RNA binding motif protein 24a                                                    | –          | –                   |
| 1.52  | <i>prkacab</i>                   | protein kinase, cAMP-dependent, catalytic, alpha, genome<br>duplicate b          | –          | –                   |
| 1.52  | <i>runx1t1</i>                   | runt-related transcription factor 1;<br>translocated to, 1(cyclin D-related)     | –          | –                   |
| 1.52  | <i>gmeb1</i>                     | glucocorticoid modulatory element binding protein 1                              | –          | –                   |
| 1.52  | <i>ctsh</i>                      | cathepsin H                                                                      | –          | –                   |
| 1.52  | <i>sult6b1</i>                   | sulfotransferase family, cytosolic, 6b, member 1                                 | [19]       | –                   |
| 1.52  | <i>fbp1a</i>                     | fructose-1,6-bisphosphatase 1a                                                   | –          | –                   |
| 1.51  | <i>pgd</i>                       | phosphogluconate dehydrogenase                                                   | [19,20]    | –                   |
| 1.51  | <i>slc4a2a</i>                   | solute carrier family 4 (anion exchanger), member 2a                             | –          | –                   |
| 1.50  | <i>ppiaa</i>                     | peptidylprolyl isomerase Aa (cyclophilin A)                                      | –          | –                   |
| 1.50  | <i>zyx</i>                       | zyxin                                                                            | –          | –                   |
| 1.50  | <i>rabif</i>                     | RAB interacting factor                                                           | –          | –                   |
| 1.50  | <i>acss1</i>                     | acyl-CoA synthetase short-chain family member 1                                  | –          | –                   |
| 1.50  | <i>si:ch211-87h14.3</i>          | chromosome 19 open reading frame 60 (C19orf60)                                   | –          | –                   |
| 1.50  | <i>psmb7</i>                     | proteasome subunit beta 7                                                        | –          | –                   |
| 1.50  | <i>penkb</i>                     | proenkephalin b                                                                  | –          | –                   |
| 1.50  | <i>sepsecs</i>                   | Sep (O-phosphoserine) tRNA: Sec (selenocysteine) tRNA<br>synthase                | –          | –                   |
| 1.50  | <i>atp6v0a1a</i>                 | ATPase, H <sup>+</sup> transporting, lysosomal V0 subunit a1a                    | –          | –                   |
| 1.50  | <i>prdx1</i>                     | peroxiredoxin 1                                                                  | [19,20]    | [16,17,19]          |

Gray highlighting indicate genes that were also identified in the previous microarray analyses using DEM- or tBHQ-treated larvae [19,20].

TABLE S4: The genes repressed by the overexpression of *nrf2a* in zebrafish.

| Ratio | Gene symbol in ZFIN | Gene product                                                              |
|-------|---------------------|---------------------------------------------------------------------------|
| 0.31  | <i>ccnc</i>         | cyclin C                                                                  |
| 0.40  | <i>prkacbb</i>      | protein kinase, cAMP-dependent, catalytic, beta b                         |
| 0.48  | <i>dynll2a</i>      | dynein, light chain, LC8-type 2a                                          |
| 0.51  | <i>slco1f1</i>      | solute carrier organic anion transporter family, member 1F1               |
| 0.54  | <i>ipo7</i>         | importin 7                                                                |
| 0.55  | <i>tmem135</i>      | transmembrane protein 135                                                 |
| 0.56  | <i>hesx1</i>        | HESX homeobox 1                                                           |
| 0.57  | <i>vps51</i>        | vacuolar protein sorting 51 homolog ( <i>S. cerevisiae</i> )              |
| 0.57  | <i>cot11</i>        | coactosin-like F-actin binding protein 1                                  |
| 0.58  | <i>sparc</i>        | secreted protein, acidic, cysteine-rich (osteonectin)                     |
| 0.58  | <i>phgdh</i>        | phosphoglycerate dehydrogenase                                            |
| 0.59  | <i>sltm</i>         | SAFB-like, transcription modulator                                        |
| 0.60  | <i>pfkpb</i>        | phosphofructokinase, platelet b                                           |
| 0.60  | <i>taf15</i>        | TAF15 RNA polymerase II, TATA box binding protein (TBP)-associated factor |
| 0.60  | <i>kpnb3</i>        | karyopherin (importin) beta 3                                             |
| 0.61  | <i>ncl</i>          | nucleolin                                                                 |
| 0.61  | <i>efemp2a</i>      | EGF containing fibulin-like extracellular matrix protein 2a               |
| 0.62  | <i>srsf5a</i>       | serine/arginine-rich splicing factor 5a                                   |
| 0.62  | <i>rnf19a</i>       | ring finger protein 19A, RBR E3 ubiquitin protein ligase                  |
| 0.62  | <i>cox15</i>        | cytochrome c oxidase assembly homolog 15 (yeast)                          |
| 0.63  | <i>fbxo11a</i>      | F-box protein 11a                                                         |
| 0.63  | <i>etf1b</i>        | eukaryotic translation termination factor 1b                              |
| 0.63  | <i>dmrt3a</i>       | doublesex and mab-3 related transcription factor 3a                       |
| 0.63  | <i>anp32e</i>       | acidic (leucine-rich) nuclear phosphoprotein 32 family, member E          |
| 0.63  | <i>gnl3</i>         | guanine nucleotide binding protein-like 3 (nucleolar)                     |
| 0.63  | <i>dennd4c</i>      | DENN/MADD domain containing 4C                                            |
| 0.64  | <i>src</i>          | v-src avian sarcoma (Schmidt-Ruppin A-2) viral oncogene homolog           |
| 0.64  | <i>anos1b</i>       | anosmin 1b                                                                |
| 0.64  | <i>pfkfb4b</i>      | 6-phosphofructo-2kinase/fructose-2,6-biphosphatase 4b                     |
| 0.64  | <i>gskip</i>        | gsk3b interacting protein                                                 |
| 0.64  | <i>cirbpa</i>       | cold inducible RNA binding protein a                                      |
| 0.64  | <i>sec14l1</i>      | SEC14-like lipid binding 1                                                |
| 0.64  | <i>tcf15</i>        | transcription factor 15 (basic helix-loop-helix)                          |
| 0.64  | <i>brd2b</i>        | bromodomain containing 2b                                                 |
| 0.64  | <i>nudt3a</i>       | nudix (nucleoside diphosphate linked moiety X)-type motif 3a              |
| 0.65  | <i>atr</i>          | alpha thalassemia/mental retardation syndrome X-linked homolog (human)    |
| 0.65  | <i>zgc:153953</i>   | chromosome 1 open reading frame 106 (C1orf106)                            |
| 0.65  | <i>zgc:113452</i>   | novel gene "zink finger protein"                                          |
| 0.65  | <i>kctd4</i>        | potassium channel tetramerization domain containing 4                     |
| 0.65  | <i>fam60al</i>      | family with sequence similarity 60, member A, like                        |
| 0.66  | <i>tle2</i>         | transducing-like enhancer of split 2 (E(sp1) homolog, <i>Drosophila</i> ) |
| 0.66  | <i>mcm6</i>         | minichromosome maintenance complex component 6                            |

TABLE S4: The genes repressed by the overexpression of *nrf2a* in zebrafish. (continued)

| Ratio | Gene symbol in ZFIN | Gene product                                                                                                     |
|-------|---------------------|------------------------------------------------------------------------------------------------------------------|
| 0.66  | <i>gsna</i>         | gelsolin a                                                                                                       |
| 0.66  | <i>snapin</i>       | SNAP-associated protein                                                                                          |
| 0.66  | <i>fscn1a</i>       | fascin actin-bundling protein 1a                                                                                 |
| 0.66  | <i>hoxa10b</i>      | homeobox A 10b                                                                                                   |
| 0.67  | <i>bmpr1aa</i>      | bone morphogenetic protein receptor, type IAa                                                                    |
| 0.67  | <i>stk35</i>        | serine/threonine kinase 35                                                                                       |
| 0.67  | <i>lsm12a</i>       | LSM 12 homolog a                                                                                                 |
| 0.67  | <i>tfap2a</i>       | transcription factor AP-2 alpha                                                                                  |
| 0.67  | <i>ptbp1a</i>       | polypyrimidine tract binding protein 1a                                                                          |
| 0.67  | <i>fzd8a</i>        | frizzled class receptor 8a                                                                                       |
| 0.67  | <i>sema4c</i>       | sema domain, immunoglobulin domain (Ig), transmembrane domain (TM) and short cytoplasmic domain (semaphorin), 4C |
| 0.67  | <i>lrwd1</i>        | leucine-rich repeats and WD repeat domain containing 1                                                           |
| 0.67  | <i>supt6h</i>       | SPT6 homolog, histone chaperone                                                                                  |
